# Supplementary material
Source: PubMed Central journal article supplement (PMC8493638)
Supplement: NIHMS1737812-supplement-2.pdf [file NIHMS1737812-supplement-2.pdf]

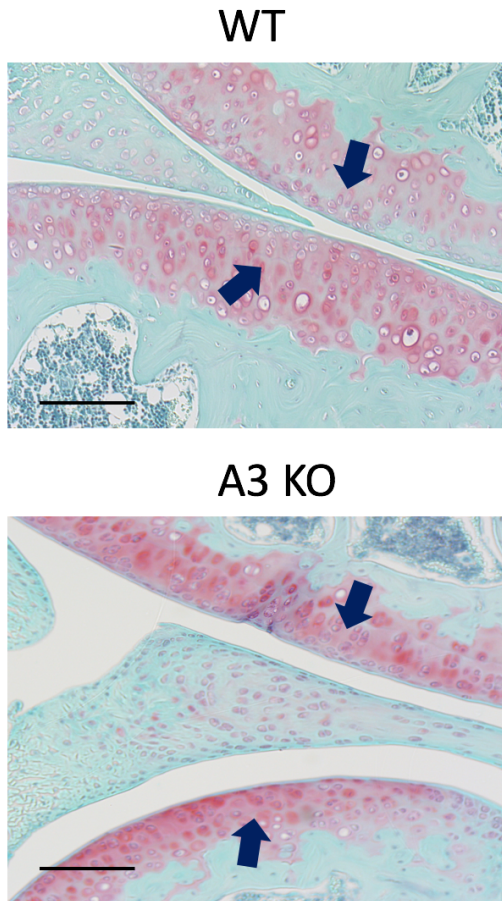

### Supplementary Figure 1

**Figure 1S. A3 receptor knockout shows no structural signs of progressive loss of articular cartilage in 12-week-old mice.** Representative images of Safranin O/Fast Green stained sections of 12-week-old mouse knee joint from wild type (WT) and A3 (ADORA3) genetic knockout (KO). **Both males (n=4) and females (n=4) were analyzed and no gender-specific differences noted.** Arrows delineate articular cartilage. No significant articular cartilage degradation and loss of glycosaminoglycans (GAGs) was present. Scale bars = 100  $\mu$ M.

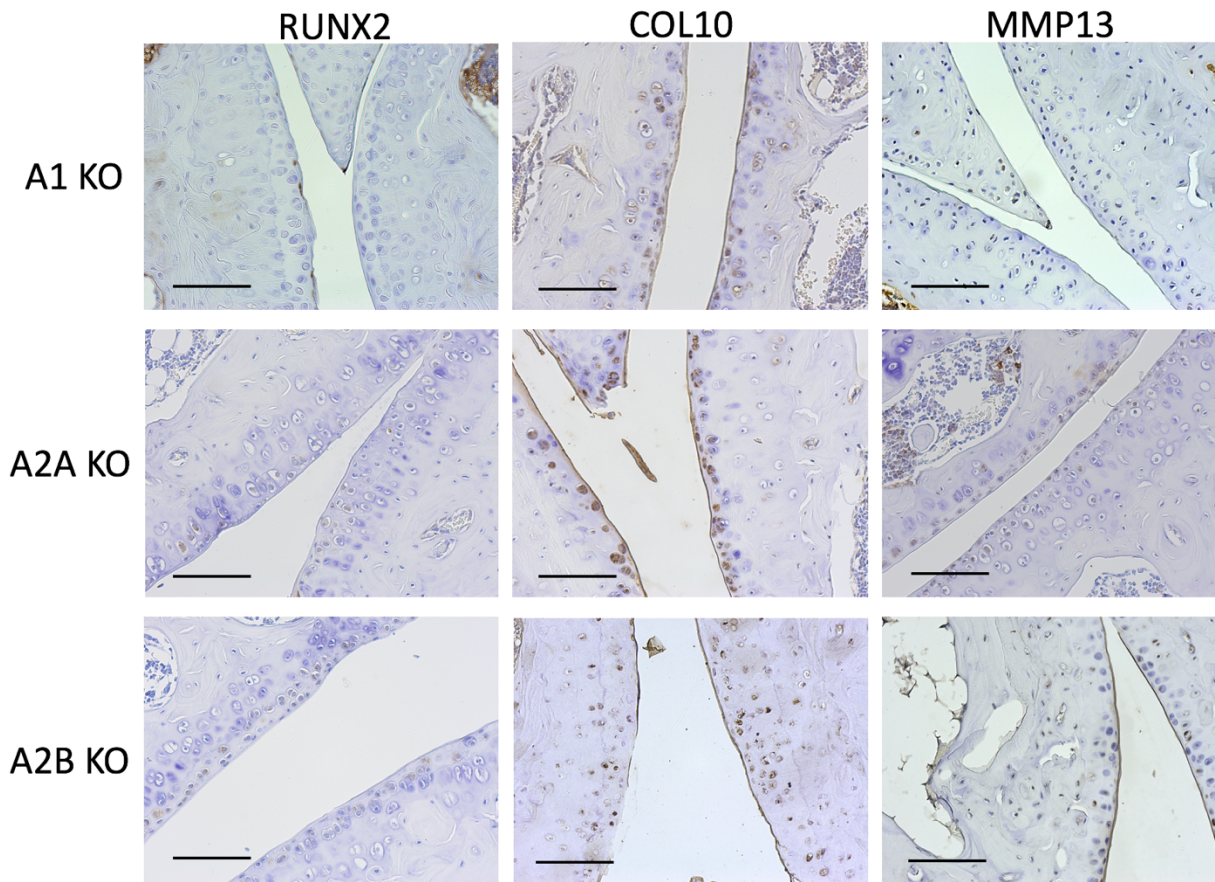

### Supplementary Figure 2

**Figure 2S. Adenosine receptor knockout results in the upregulation of markers of osteoarthritis in mice.** Sections of A1 (ADORA1), A2A (ADORA2A) and A2B (ADORA2B) KO mouse knee joints were stained for various markers of osteoarthritis: Runx2, Collagen type X, and MMP13. Representative images are shown. Scale bar = 20  $\mu$ M.

**Supplementary Table 1. Antibodies used in the current study.**

| <b>Antibody</b>                  | <b>Vendor</b>                | <b>Catalog Number</b> |
|----------------------------------|------------------------------|-----------------------|
| phospho-CaMKII                   | Abcam                        | Ab32678               |
| Runx2                            | Cell Signaling               | 12556                 |
| Histone 3                        | Cell Signaling               | 4499                  |
| MMP13                            | Abgent                       | AP13706c              |
| ADAMTS4                          | Abgent                       | AP7439b               |
| Collagen X                       | Abcam                        | ab49945               |
| Aggrecan Neo-epitope             | Novus Biologicals            | NB100-74350           |
| Collagen II Neo-epitope          | IBEX<br>Pharmaceuticals Inc. | 50-1035               |
| ADORA3                           | Signalway Antibody           | 35615                 |
| AlexaFluor-594 Secondary (IHC)   | Biolegend                    | 406404                |
| Rabbit IgG Secondary (IHC)       | Vector Laboratories          | I-1000                |
| Mouse IgG Secondary (IHC)        | Vector Laboratories          | I-2000                |
| Rabbit IgG Secondary<br>Antibody | Thermo Fisher                | 31460                 |
| Mouse IgG Secondary Antibody     | Thermo Fisher                | 31430                 |

| <b>GENETIC KO (8 mice/group) 64 weeks-72 weeks</b> | <b>HEALTH PROBLEM</b>                                         | <b>Weight, gram<br/>MEAN +/- SD</b> |
|----------------------------------------------------|---------------------------------------------------------------|-------------------------------------|
| WT                                                 | NONE                                                          | 28.075 +/- 4.05                     |
| A1                                                 | ENLARGED SPLEEN                                               | 29.56 +/- 3.21                      |
| A2A                                                | TUMORS<br>ENLARGED LIVER<br>ENLARGED SPLEEN<br>KIDNEY FAILURE | 31.26 +/- 3.3                       |
| A2B                                                | TUMORS<br>OBESITY (>40g)<br>CIRRHOSIS                         | 45.85 +/- 4.38                      |
| A3 KO                                              | ENLARGED LIVER                                                | 33.76 +/- 2.55                      |

**Supplementary Table 2.** Health status and body weight of transgenic mice used in the current study
